# Supplementary material for: Glacial acetic acid as a resolution solvent for growing enantiopure crystals from racemic mixtures
Source: Royal Society of Chemistry journal article supplement (doi:10.1039/d4qi01944j), 2024-10-09
Supplement: d4qi01944j1.pdf [file d4qi01944j1.pdf]

Supporting Information for

## **Glacial Acetic Acid as Resolution Solvent for Growing Enantiopure Crystals from Racemic Mixtures**

Hongwen Deng<sup>a</sup>, Peng Yuan<sup>a</sup>, Kejie Lao<sup>a</sup>, Qijun Fu<sup>a</sup>, Boon K. Teo<sup>\*a</sup>, and Nanfeng Zheng<sup>\*a,b</sup>

<sup>a</sup>New Cornerstone Science Laboratory, State Key Laboratory for Physical Chemistry of Solid Surfaces, Collaborative Innovation Center of Chemistry for Energy Materials, and National & Local Joint Engineering Research Center of Preparation Technology of Nanomaterials, College of Chemistry and Chemical Engineering, Xiamen University, Xiamen 361005, China

<sup>b</sup>Innovation Laboratory for Sciences and Technologies of Energy Materials of Fujian Province (IKKEM), Xiamen 361102, China

\*Corresponding Authors. Email: boonkteo@xmu.edu.cn, nfzheng@xmu.edu.cn

## Experimental Section

### Reagents.

Bis(diphenylphosphino)methane (dppm, purity 98%), *t*-butylisonitrile (CN<sup>*t*</sup>Bu, purity 97%), hexamethyldisilathiane [(Me<sub>3</sub>Si)<sub>2</sub>S, purity 98%] and palladium acetate [Pd(OAc)<sub>2</sub>, purity 99%] were purchased from Energy Chemical (Shanghai, China). (*S*)-1,1'-Binaphthyl-2,2'-diyl hydrogen phosphate and (*R*)-1,1'-Binaphthyl-2,2'-diyl hydrogen phosphate (**S-Phos** and **R-Phos**, purity 99%) were purchased from Bidepharm (Shanghai, China). Potassium hexafluorophosphate (KPF<sub>6</sub>, purity 99%) was purchased from Innochem (Beijing, China). Acetic acid (CH<sub>3</sub>COOH, A.R.), dichloromethane (CH<sub>2</sub>Cl<sub>2</sub>, A.R.), methanol (CH<sub>3</sub>OH, A.R.) and diethyl ether (Et<sub>2</sub>O, A.R.) were purchased from Sinopharm Chemical Reagent Co. Ltd. (Shanghai, China). Carbon monoxide (CO, purity 99.999%) was purchased from Messer (Foshan, China). All reagents were used as received without further purification.

### Synthesis of [Pd<sub>4</sub>(CO)<sub>4</sub>(OAc)<sub>4</sub>].

The [Pd<sub>4</sub>(CO)<sub>4</sub>(OAc)<sub>4</sub>] was synthesized according to the modified literature procedure<sup>[1]</sup>. In brief, 20 mg Pd(OAc)<sub>2</sub> was dissolved in 6 mL acetic acid. The mixture was stirred under 2 atm CO at 60 °C for 2 hours, then kept under CO atmosphere for another 2 hours without heating to precipitate [Pd<sub>4</sub>(CO)<sub>4</sub>(OAc)<sub>4</sub>] from the solution. The yellow precipitate was collected by centrifugation and used for the next step immediately without drying. The yield of [Pd<sub>4</sub>(CO)<sub>4</sub>(OAc)<sub>4</sub>] was ca. 90%.

### Synthesis of [Pd<sub>4</sub>S<sub>2</sub>(dppm)<sub>3</sub>(CN<sup>*t*</sup>Bu)<sub>2</sub>]<sup>2+</sup> (abbreviated as Pd<sub>4</sub>S<sub>2</sub>).

The freshly prepared [Pd<sub>4</sub>(CO)<sub>4</sub>(OAc)<sub>4</sub>] was dispersed in 4 mL CH<sub>2</sub>Cl<sub>2</sub> and treated with 30 μL CN<sup>*t*</sup>Bu quickly, the yellow cloudy liquid turned colorless and transparent. 34.2 mg of dppm dissolved in 4 mL CH<sub>2</sub>Cl<sub>2</sub> was added. The solution turned orange. Then 18.7 μL of (Me<sub>3</sub>Si)<sub>2</sub>S was added into the solution and stirred 1.5 hours in air. The insoluble impurities were removed by centrifugation. The solution was subjected to the diffusion of ether. Red crystals were obtained in the yield of 62.5 % (based on Pd(OAc)<sub>2</sub>) after a week.

### Recrystallization of Pd<sub>4</sub>S<sub>2</sub>.

1 mg of Pd<sub>4</sub>S<sub>2</sub> crystals grown from dichloromethane was dissolved in 2 mL MeOH or glacial acetic acid and the solution was subjected to the diffusion of ether. PF<sub>6</sub><sup>-</sup> was introduced by using KPF<sub>6</sub> when recrystallization solvent is MeOH. Yellow crystals were obtained after about one week.

### Enantioseparation of Pd<sub>4</sub>S<sub>2</sub>.

3 mg of Pd<sub>4</sub>S<sub>2</sub> crystals grown from dichloromethane was dissolved in 1 mL MeOH and treated with 1 equiv. **S-Phos** or **R-Phos** then stirred for 3 hours in air. The solution was subjected to the diffusion of ether. Yellow crystals were obtained after two week.

### Racemization Experiment.

**S-Phos**&**R-Pd<sub>4</sub>S<sub>2</sub>** or **R-Phos**&**S-Pd<sub>4</sub>S<sub>2</sub>** dissolved in glycol as stock solution. Constant concentration solutions were prepared for racemization at 353, 358, 363 and 368K. They were placed in a cuvette with a 0.5 cm optical path and sealed with a plastic stopper and parafilm to minimize solvent evaporation. Each sample is equilibrated for two minutes at the designated temperature before recording the ECD signal. The CD signal at 444nm was recorded over the course of 30 min with intervals of 5 s.

**Single crystal analysis.**

The diffraction data of were collected by X-ray single crystal diffractometer with Cu K $\alpha$  radiation ( $\lambda = 1.54184 \text{ \AA}$ ) at 100 K on an Rigaku XtaLab Synergy R system. The data were processed using CrysAlis<sup>Pro</sup>[2]. Crystal structures were solved and refined using Full-matrix least-squares based on  $F^2$  with program ShelXT[3] and ShelXL[4] within Olex2[5]. The electron densities of highly disordered molecules were treated by SQUEEZE[6] on the PLATON[7] platform.

**Physical Measurements.**

Electrospray ionization mass spectra (ESI-MS) were collected on Agilent 6224 time-of-flight mass spectrometer. UV-vis absorption spectra were recorded on a Shimadzu UV-2550 Spectrophotometer. ECD spectra were recorded on a JASCO J-810 CD-spectrometer. The PXRD experiment was conducted on Rigaku Ultima IV. Fourier transform infrared (FT-IR) spectrum was recorded on a Nicolet iS50 spectrophotometer. The X-ray photoelectron spectroscopic (XPS) analysis was performed on Thermo Scientific ESCALAB Xi+.

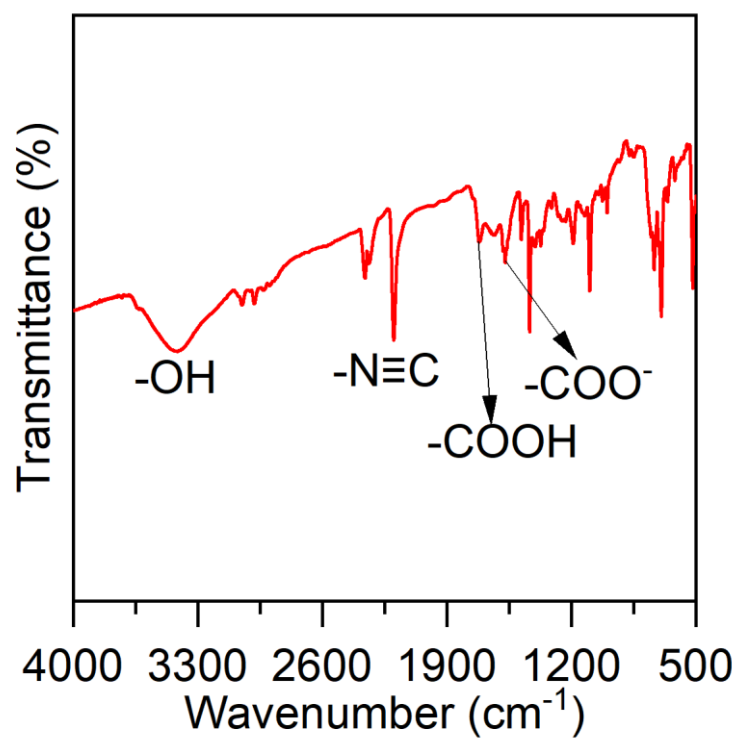

**Fig. S1** The Fourier transform infrared (FT-IR) spectrum of **Pd<sub>4</sub>S<sub>2</sub>**.

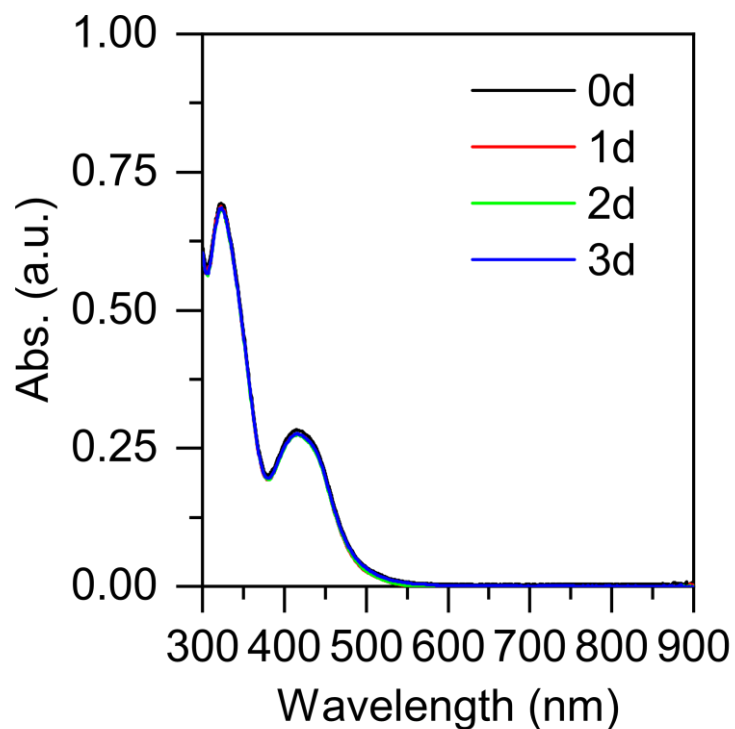

**Fig. S2** UV-vis spectra of a solution of **Pd<sub>4</sub>S<sub>2</sub>** in methanol under ambient condition for 0-3 days showing high stability.

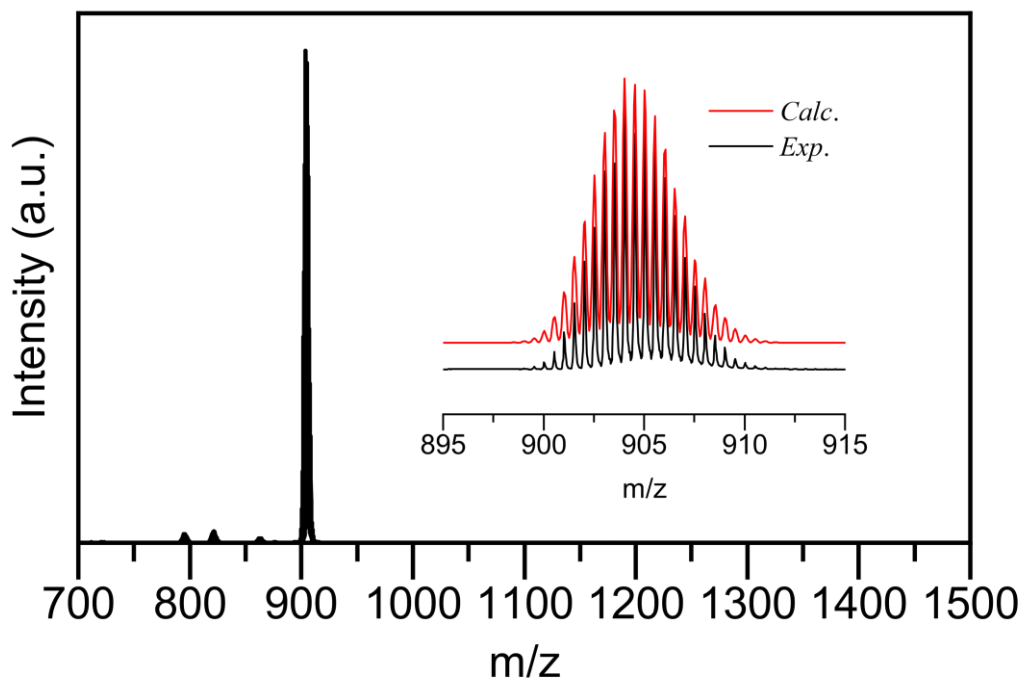

**Fig. S3** ESI-MS spectrum of  $\text{Pd}_4\text{S}_2$ . Inset: experimental (black curve) and simulated (red curve) isotope distribution pattern of  $\text{Pd}_4\text{S}_2$ .

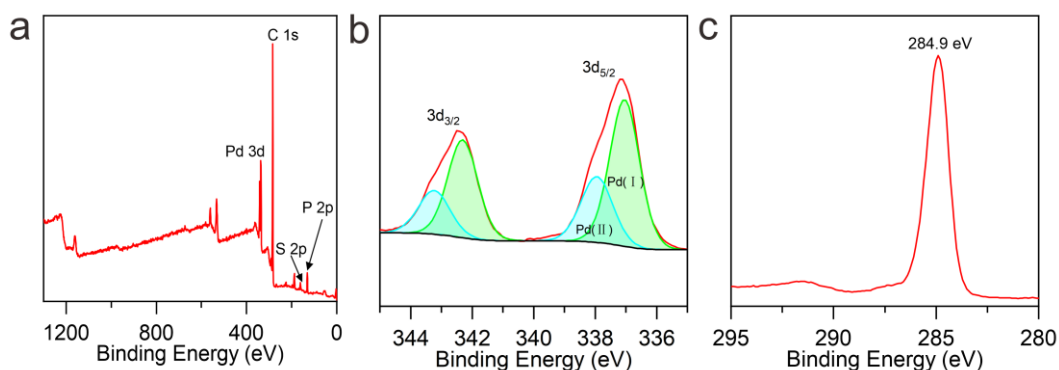

**Fig. S4** The XPS spectra of ground powder of as-grown single crystals of  $\text{Pd}_4\text{S}_2$  grown from dichloromethane: (a) Survey spectrum. (b) High-resolution XPS spectrum of Pd 3d, which can be deconvoluted into four peaks, corresponding to the Pd(I) and Pd(II). The bonding energy (Pd  $3d_{5/2}$ ) of fitted Pd(I) component is 337.0 eV with FWHM of 1.15 eV. The bonding energy (Pd  $3d_{5/2}$ ) of fitted Pd(II) component is 337.9 eV with FWHM of 1.21 eV. (c) High-resolution XPS spectrum of C 1s.

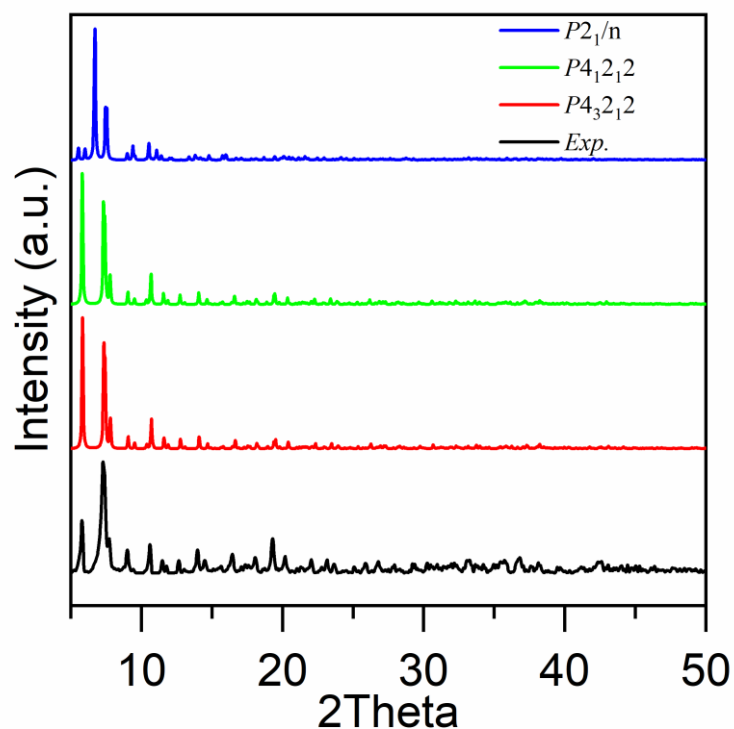

**Fig. S5** Simulated (blue, green and red curves) PXRD patterns of **Pd<sub>4</sub>S<sub>2</sub>** under different space group based on the respective single crystal structures and experimental (black curve) PXRD pattern of **Pd<sub>4</sub>S<sub>2</sub>** from ground powder of as-prepared crystals grown from dichloromethane.

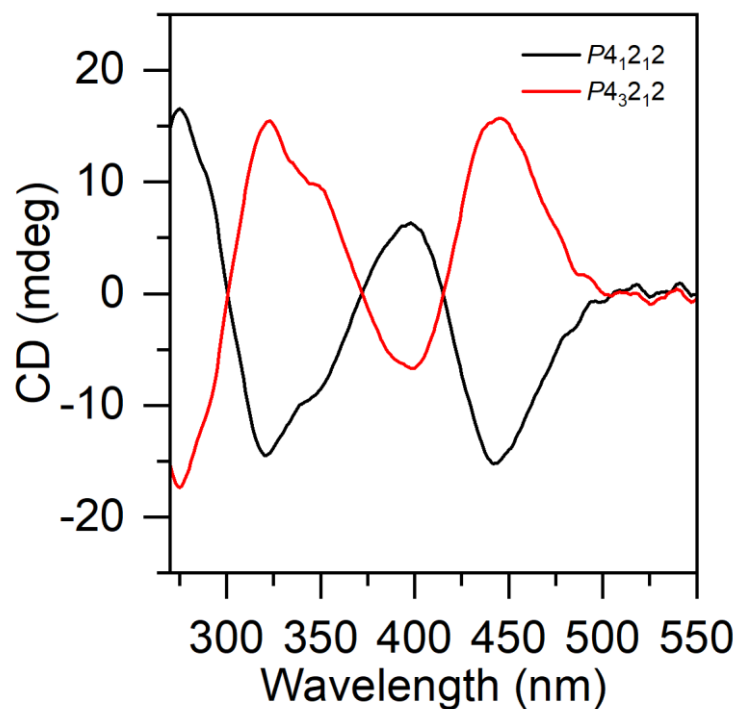

**Fig. S6** The ECD spectra of single crystals of **Pd<sub>4</sub>S<sub>2</sub>-P<sub>4</sub><sub>1</sub><sub>2</sub><sub>1</sub><sub>2</sub>** and **Pd<sub>4</sub>S<sub>2</sub>-P<sub>4</sub><sub>3</sub><sub>2</sub><sub>1</sub><sub>2</sub>** dissolved in methanol.

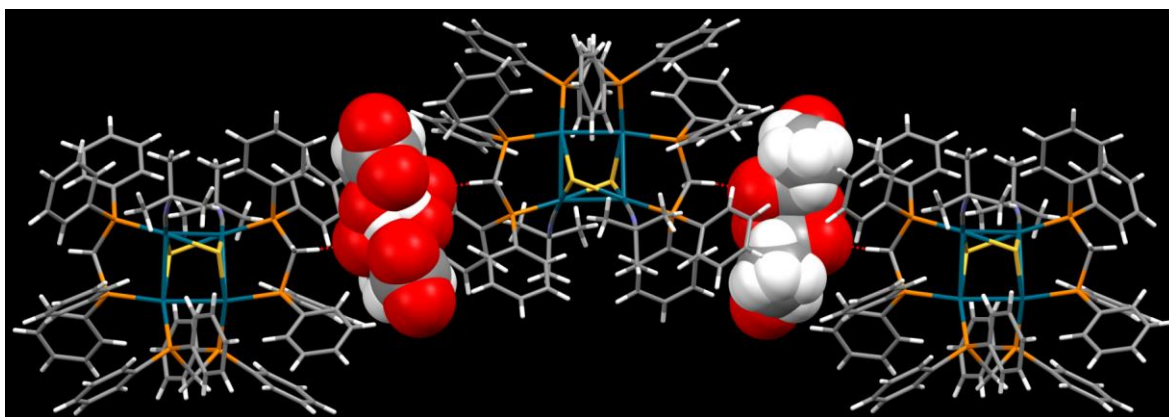

**Fig. S7** The homochiral “Pd<sub>4</sub>S<sub>2</sub> chain” formed by aggregate **B** as a “linker” . Color legend: deep sky-blue, Pd; yellow, S; Orange, P; light purple, N; red, O; grey sphere, C.

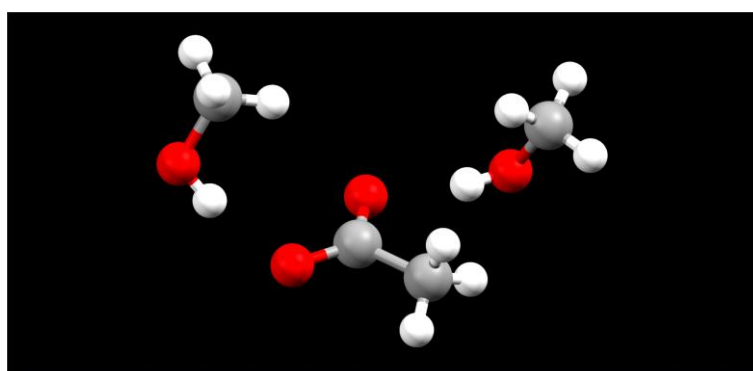

**Fig. S8** The aggregate formed by methanol and acetate through hydrogen bonding in Pd<sub>4</sub>S<sub>2</sub>-P<sub>2</sub>/n-MeOH. Color legend: red, O; grey, C; white, H.

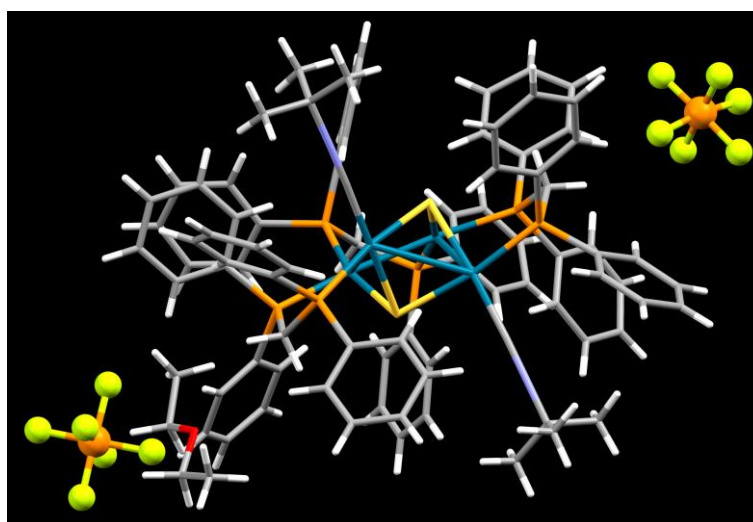

**Fig. S9** Crystal structure of Pd<sub>4</sub>S<sub>2</sub> with PF<sub>6</sub><sup>-</sup> as counterions. Color legend: deep sky-blue, Pd; yellow, S; Orange, P; green, F; red, O; light purple, N; grey, C; white, H.

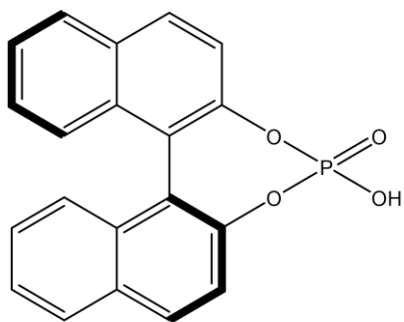

(*S*)-1,1'-Binaphthyl-2,2'-diyl hydrogen phosphate

### S-Phos

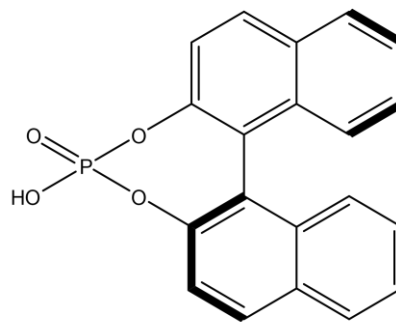

(*R*)-1,1'-Binaphthyl-2,2'-diyl hydrogen phosphate

### R-Phos

**Fig. S10** Molecular structures of (*S*)-1,1'-Binaphthyl-2,2'-diyl hydrogen phosphate and (*R*)-1,1'-Binaphthyl-2,2'-diyl hydrogen phosphate.

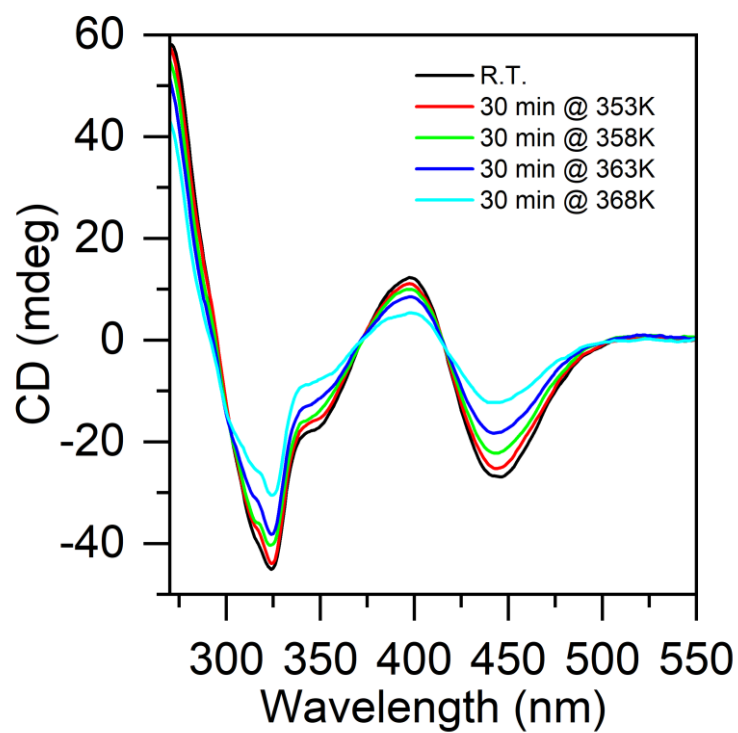

**Fig. S11** The ECD spectra of *S*-Phos&*R*-Pd<sub>4</sub>S<sub>2</sub> before (black) and after thermal treatments (30 min each).



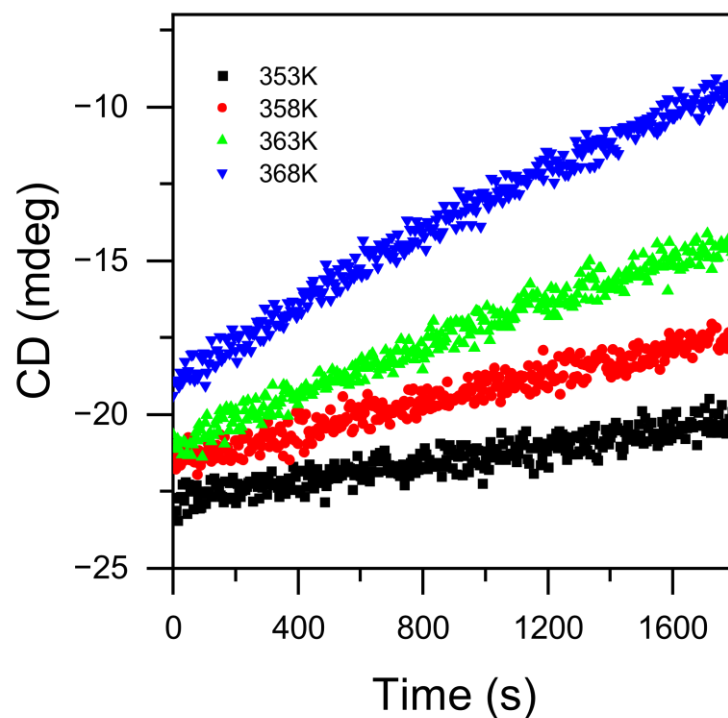

**Fig. S12** ECD response at 444 nm of *S*-Phos&*R*-Pd<sub>4</sub>S<sub>2</sub> as a function of time at different temperatures.

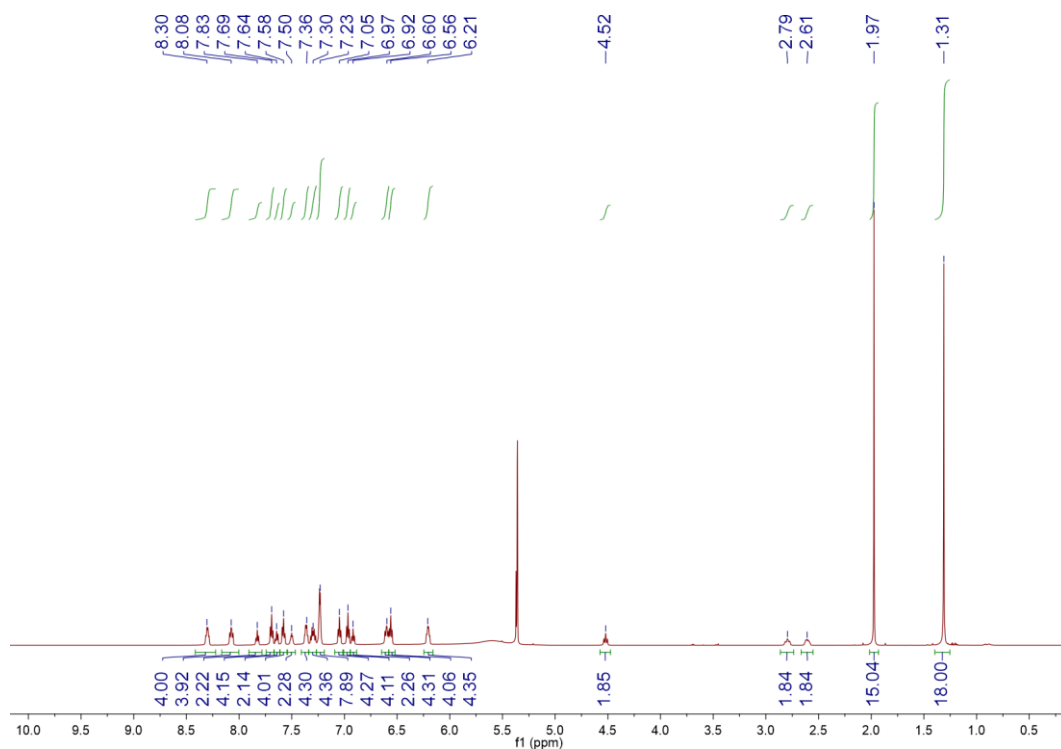

**Fig. S13** <sup>1</sup>H NMR spectrum of Pd<sub>4</sub>S<sub>2</sub>-P<sub>4</sub>1<sub>2</sub>1<sub>2</sub> and Pd<sub>4</sub>S<sub>2</sub>-P<sub>4</sub>3<sub>2</sub>1<sub>2</sub> crystals in CD<sub>2</sub>Cl<sub>2</sub>. The peak at 1.31 ppm is assigned to the six methyl groups of the CN<sup>t</sup>Bu ligand on Pd<sub>4</sub>S<sub>2</sub> with integral area of 18. The peak at 1.97 ppm is assigned to the methyl of HOAc or OAc<sup>-</sup>. Given the charge of Pd<sub>4</sub>S<sub>2</sub>, it's reasonable to consider the peak at 1.97 ppm as two OAc<sup>-</sup> and three HOAc.

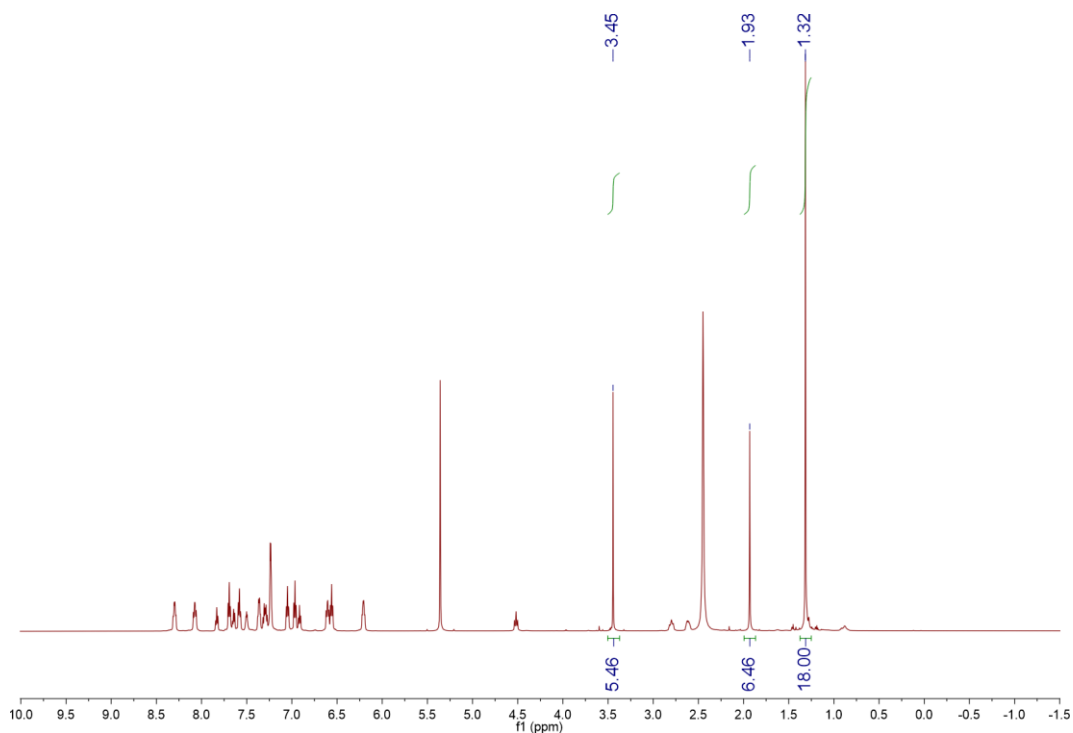

**Fig. S14**  $^1\text{H}$  NMR spectrum of **Pd<sub>4</sub>S<sub>2</sub>-P<sub>21</sub>/n-MeOH** crystals in  $\text{CD}_2\text{Cl}_2$ . The peak at 1.32 ppm is assigned to the six methyl groups of the CN<sup>t</sup>Bu ligand on **Pd<sub>4</sub>S<sub>2</sub>** with integral area of 18. The peak at 1.93 ppm is mainly assigned to the methyl of OAc<sup>-</sup> (Two OAc<sup>-</sup>). The peak at 3.45 ppm is assigned to the methyl of methanol (Approximately two methanol).

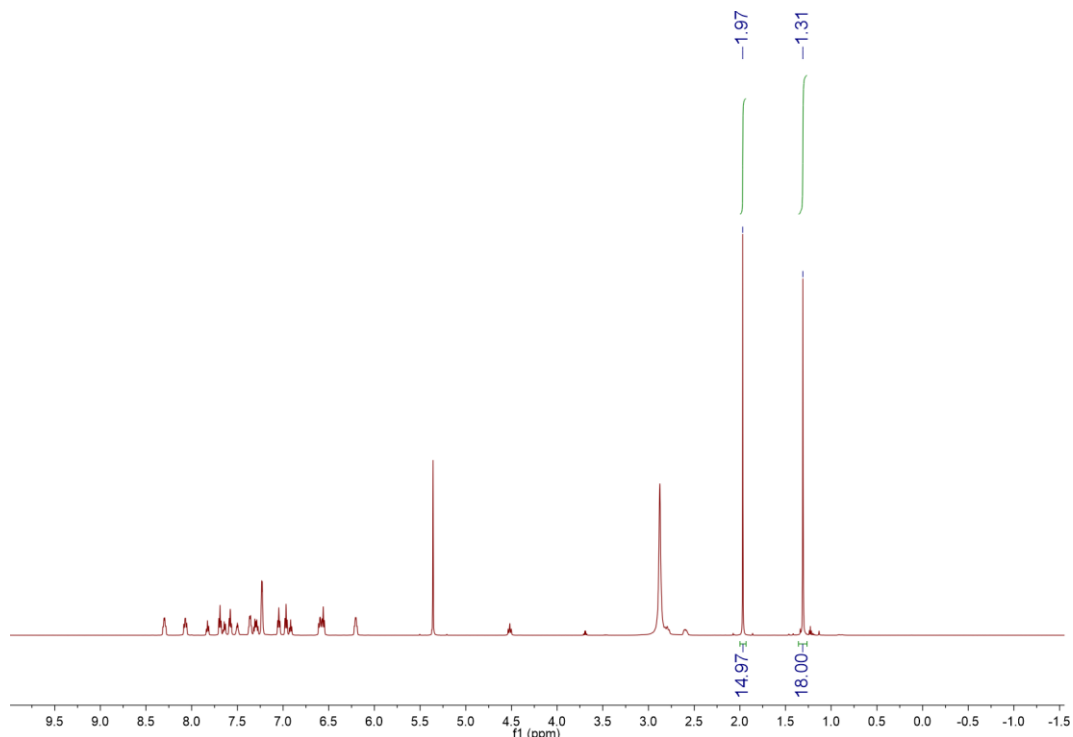

**Fig. S15**  $^1\text{H}$  NMR spectrum of **Pd<sub>4</sub>S<sub>2</sub>-P<sub>41212</sub>/P<sub>43212</sub>-twin** crystals in  $\text{CD}_2\text{Cl}_2$ . The peak at 1.31 ppm is assigned to the six methyl groups of the CN<sup>t</sup>Bu ligand on **Pd<sub>4</sub>S<sub>2</sub>** with integral area of 18. The peak at 1.97 ppm is assigned to the methyl of three HOAc and two OAc<sup>-</sup>, the same situation in **Fig. S13**.

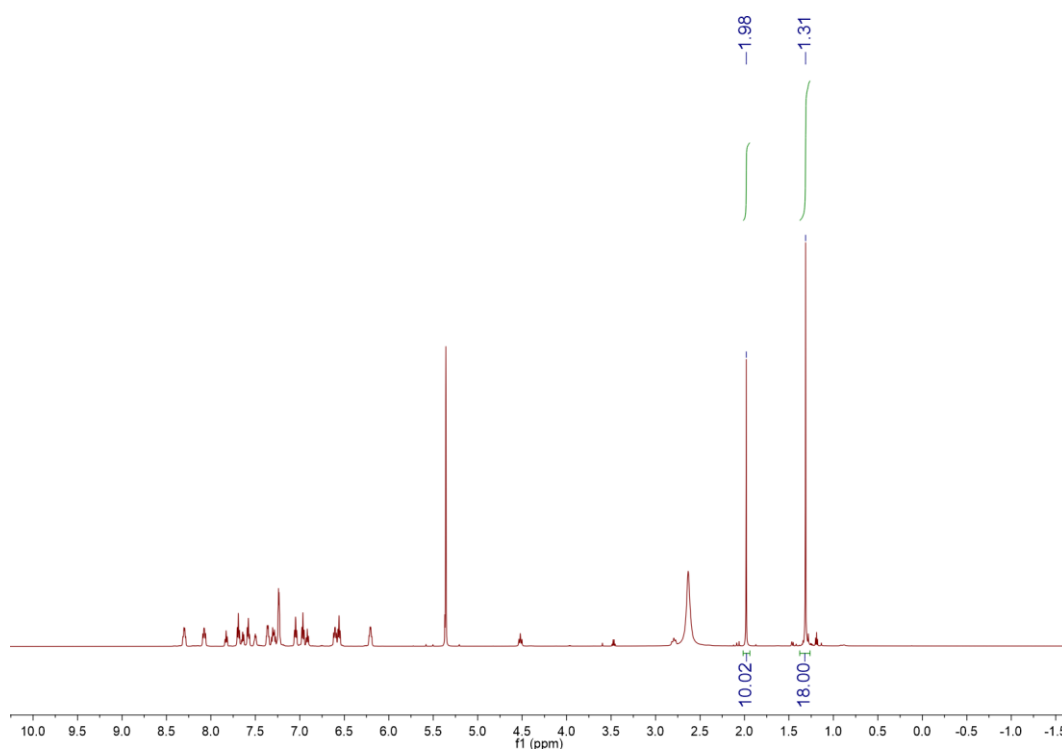

**Fig. S16**  $^1\text{H}$  NMR spectrum of  $\text{Pd}_4\text{S}_2\text{-}P_{21/n}$  crystals in  $\text{CD}_2\text{Cl}_2$ . The peak at 1.31 ppm is assigned to the six methyl groups of the  $\text{CN}^t\text{Bu}$  ligand on  $\text{Pd}_4\text{S}_2$  with integral area of 18. The peak at 1.98 ppm is assigned to the methyl of  $\text{HOAc}$  or  $\text{OAc}^-$ . Given the charge of  $\text{Pd}_4\text{S}_2$ , it's reasonable to consider the peak at 1.97 ppm as two  $\text{OAc}^-$  and approximately one  $\text{HOAc}$ .

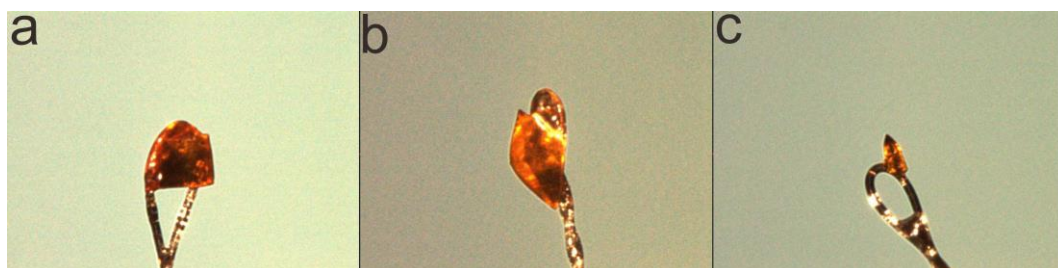

**Fig. S17** Photographs of single crystals of  $\text{Pd}_4\text{S}_2$ . (a) Achiral space group  $P_{21/n}$ ; (b) Chiral space group with Flack parameter of 0.5; (c) Chiral space group with Flack parameter of zero.

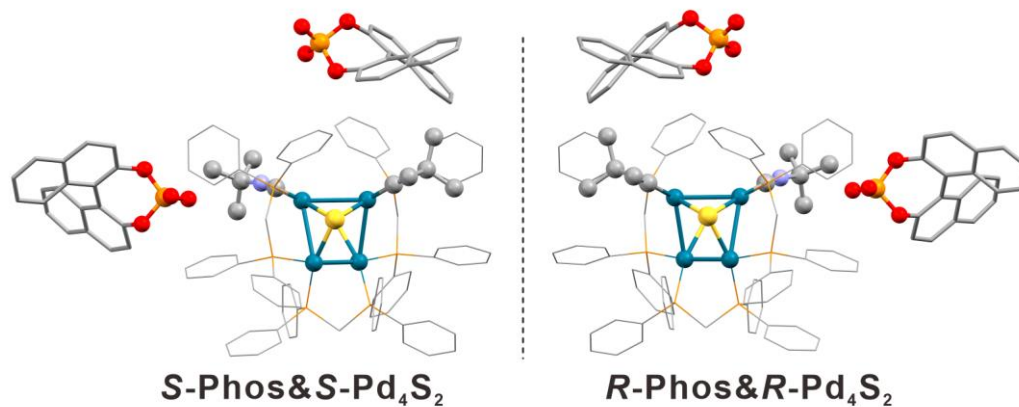

**Fig. S18** Enantiomer pair of *S*-Phos&*S*-Pd<sub>4</sub>S<sub>2</sub> and *R*-Phos&*R*-Pd<sub>4</sub>S<sub>2</sub>. Color legend: deep sky-blue, Pd; yellow, S; Orange, P; light purple, N; red, O; grey sphere, C. All hydrogen atoms and solvents are omitted for clarity.

**Table S1.** Crystal data and structure refinement for **Pd<sub>4</sub>S<sub>2</sub>-P4<sub>1</sub>2<sub>1</sub>2-twin**.

|                                                              |                                                                                                             |
|--------------------------------------------------------------|-------------------------------------------------------------------------------------------------------------|
| Identification code                                          | <b>Pd<sub>4</sub>S<sub>2</sub>-P4<sub>1</sub>2<sub>1</sub>2-twin</b>                                        |
| Empirical formula                                            | C <sub>93</sub> H <sub>98</sub> N <sub>2</sub> O <sub>8</sub> P <sub>6</sub> Pd <sub>4</sub> S <sub>2</sub> |
| Formula weight                                               | 2047.27                                                                                                     |
| Temperature/K                                                | 99.99(10)                                                                                                   |
| Crystal system                                               | tetragonal                                                                                                  |
| Space group                                                  | <i>P4<sub>1</sub>2<sub>1</sub>2</i>                                                                         |
| <i>a</i> /Å                                                  | 17.10100(10)                                                                                                |
| <i>b</i> /Å                                                  | 17.10100(10)                                                                                                |
| <i>c</i> /Å                                                  | 33.2613(2)                                                                                                  |
| $\alpha$ /°                                                  | 90                                                                                                          |
| $\beta$ /°                                                   | 90                                                                                                          |
| $\gamma$ /°                                                  | 90                                                                                                          |
| Volume/Å <sup>3</sup>                                        | 9727.07(13)                                                                                                 |
| <i>Z</i>                                                     | 4                                                                                                           |
| $\rho_{\text{calc}}$ /cm <sup>3</sup>                        | 1.398                                                                                                       |
| $\mu$ /mm <sup>-1</sup>                                      | 7.617                                                                                                       |
| F(000)                                                       | 4160.0                                                                                                      |
| Crystal size/mm <sup>3</sup>                                 | 0.1 × 0.1 × 0.1                                                                                             |
| Radiation                                                    | Cu K $\alpha$ ( $\lambda$ = 1.54184)                                                                        |
| 2 $\Theta$ range for data collection/°                       | 5.812 to 154.27                                                                                             |
| Index ranges                                                 | -21 ≤ <i>h</i> ≤ 20, -20 ≤ <i>k</i> ≤ 21, -27 ≤ <i>l</i> ≤ 41                                               |
| Reflections collected                                        | 34464                                                                                                       |
| Independent reflections                                      | 9760 [ <i>R</i> <sub>int</sub> = 0.0366, <i>R</i> <sub>sigma</sub> = 0.0318]                                |
| Data/restraints/parameters                                   | 9760/72/598                                                                                                 |
| Goodness-of-fit on F <sup>2</sup>                            | 1.108                                                                                                       |
| Final <i>R</i> indexes [ <i>I</i> ≥ 2 $\sigma$ ( <i>I</i> )] | <i>R</i> <sub>1</sub> = 0.0424, <i>wR</i> <sub>2</sub> = 0.1084                                             |
| Final <i>R</i> indexes [all data]                            | <i>R</i> <sub>1</sub> = 0.0461, <i>wR</i> <sub>2</sub> = 0.1104                                             |
| Largest diff. peak/hole / e Å <sup>-3</sup>                  | 0.85/-0.82                                                                                                  |
| Flack parameter                                              | 0.501(13)                                                                                                   |

**Table S2.** Crystal data and structure refinement for **Pd<sub>4</sub>S<sub>2</sub>-P4<sub>3</sub>2<sub>1</sub>2-twin**.

|                                                              |                                                                                                             |
|--------------------------------------------------------------|-------------------------------------------------------------------------------------------------------------|
| Identification code                                          | <b>Pd<sub>4</sub>S<sub>2</sub>-P4<sub>3</sub>2<sub>1</sub>2-twin</b>                                        |
| Empirical formula                                            | C <sub>93</sub> H <sub>98</sub> N <sub>2</sub> O <sub>8</sub> P <sub>6</sub> Pd <sub>4</sub> S <sub>2</sub> |
| Formula weight                                               | 2047.27                                                                                                     |
| Temperature/K                                                | 100.00(10)                                                                                                  |
| Crystal system                                               | tetragonal                                                                                                  |
| Space group                                                  | <i>P</i> 4 <sub>3</sub> 2 <sub>1</sub> 2                                                                    |
| <i>a</i> /Å                                                  | 17.04730(10)                                                                                                |
| <i>b</i> /Å                                                  | 17.04730(10)                                                                                                |
| <i>c</i> /Å                                                  | 33.2526(2)                                                                                                  |
| $\alpha$ /°                                                  | 90                                                                                                          |
| $\beta$ /°                                                   | 90                                                                                                          |
| $\gamma$ /°                                                  | 90                                                                                                          |
| Volume/Å <sup>3</sup>                                        | 9663.55(13)                                                                                                 |
| <i>Z</i>                                                     | 4                                                                                                           |
| $\rho_{\text{calc}}$ /cm <sup>3</sup>                        | 1.407                                                                                                       |
| $\mu$ /mm <sup>-1</sup>                                      | 7.667                                                                                                       |
| <i>F</i> (000)                                               | 4160.0                                                                                                      |
| Crystal size/mm <sup>3</sup>                                 | 0.3 × 0.05 × 0.05                                                                                           |
| Radiation                                                    | Cu K $\alpha$ ( $\lambda$ = 1.54184)                                                                        |
| 2 $\Theta$ range for data collection/°                       | 5.826 to 153.362                                                                                            |
| Index ranges                                                 | -19 ≤ <i>h</i> ≤ 21, -21 ≤ <i>k</i> ≤ 20, -40 ≤ <i>l</i> ≤ 15                                               |
| Reflections collected                                        | 33652                                                                                                       |
| Independent reflections                                      | 9529 [ <i>R</i> <sub>int</sub> = 0.0434, <i>R</i> <sub>sigma</sub> = 0.0389]                                |
| Data/restraints/parameters                                   | 9529/99/597                                                                                                 |
| Goodness-of-fit on <i>F</i> <sup>2</sup>                     | 1.080                                                                                                       |
| Final <i>R</i> indexes [ <i>I</i> ≥ 2 $\sigma$ ( <i>I</i> )] | <i>R</i> <sub>1</sub> = 0.0372, <i>wR</i> <sub>2</sub> = 0.0997                                             |
| Final <i>R</i> indexes [all data]                            | <i>R</i> <sub>1</sub> = 0.0399, <i>wR</i> <sub>2</sub> = 0.1020                                             |
| Largest diff. peak/hole / e Å <sup>-3</sup>                  | 1.38/-0.81                                                                                                  |
| Flack parameter                                              | 0.498(11)                                                                                                   |

**Table S3.** Crystal data and structure refinement for **Pd<sub>4</sub>S<sub>2</sub>-P4<sub>1</sub>2<sub>1</sub>2**.

|                                                              |                                                                                                             |
|--------------------------------------------------------------|-------------------------------------------------------------------------------------------------------------|
| Identification code                                          | <b>Pd<sub>4</sub>S<sub>2</sub>-P4<sub>1</sub>2<sub>1</sub>2</b>                                             |
| Empirical formula                                            | C <sub>93</sub> H <sub>98</sub> N <sub>2</sub> O <sub>8</sub> P <sub>6</sub> Pd <sub>4</sub> S <sub>2</sub> |
| Formula weight                                               | 2047.27                                                                                                     |
| Temperature/K                                                | 100.00(10)                                                                                                  |
| Crystal system                                               | tetragonal                                                                                                  |
| Space group                                                  | <i>P</i> 4 <sub>1</sub> 2 <sub>1</sub> 2                                                                    |
| <i>a</i> /Å                                                  | 17.04700(10)                                                                                                |
| <i>b</i> /Å                                                  | 17.04700(10)                                                                                                |
| <i>c</i> /Å                                                  | 33.2441(3)                                                                                                  |
| $\alpha$ /°                                                  | 90                                                                                                          |
| $\beta$ /°                                                   | 90                                                                                                          |
| $\gamma$ /°                                                  | 90                                                                                                          |
| Volume/Å <sup>3</sup>                                        | 9660.74(14)                                                                                                 |
| <i>Z</i>                                                     | 4                                                                                                           |
| $\rho_{\text{calc}}$ /cm <sup>3</sup>                        | 1.408                                                                                                       |
| $\mu$ /mm <sup>-1</sup>                                      | 7.669                                                                                                       |
| F(000)                                                       | 4160.0                                                                                                      |
| Crystal size/mm <sup>3</sup>                                 | 0.01 × 0.01 × 0.01                                                                                          |
| Radiation                                                    | Cu K $\alpha$ ( $\lambda$ = 1.54184)                                                                        |
| 2 $\Theta$ range for data collection/°                       | 5.826 to 153.934                                                                                            |
| Index ranges                                                 | -21 ≤ <i>h</i> ≤ 19, -21 ≤ <i>k</i> ≤ 18, -25 ≤ <i>l</i> ≤ 41                                               |
| Reflections collected                                        | 28900                                                                                                       |
| Independent reflections                                      | 9564 [ <i>R</i> <sub>int</sub> = 0.0347, <i>R</i> <sub>sigma</sub> = 0.0364]                                |
| Data/restraints/parameters                                   | 9564/96/574                                                                                                 |
| Goodness-of-fit on F <sup>2</sup>                            | 1.099                                                                                                       |
| Final <i>R</i> indexes [ <i>I</i> ≥ 2 $\sigma$ ( <i>I</i> )] | <i>R</i> <sub>1</sub> = 0.0442, <i>wR</i> <sub>2</sub> = 0.1129                                             |
| Final <i>R</i> indexes [all data]                            | <i>R</i> <sub>1</sub> = 0.0487, <i>wR</i> <sub>2</sub> = 0.1153                                             |
| Largest diff. peak/hole / e Å <sup>-3</sup>                  | 0.95/-0.72                                                                                                  |
| Flack parameter                                              | 0.001(4)                                                                                                    |

**Table S4.** Crystal data and structure refinement for **Pd<sub>4</sub>S<sub>2</sub>-P4<sub>3</sub>2<sub>1</sub>2**.

---

|                                                              |                                                                                                             |
|--------------------------------------------------------------|-------------------------------------------------------------------------------------------------------------|
| Identification code                                          | <b>Pd<sub>4</sub>S<sub>2</sub>-P4<sub>3</sub>2<sub>1</sub>2</b>                                             |
| Empirical formula                                            | C <sub>93</sub> H <sub>98</sub> N <sub>2</sub> O <sub>8</sub> P <sub>6</sub> Pd <sub>4</sub> S <sub>2</sub> |
| Formula weight                                               | 2047.27                                                                                                     |
| Temperature/K                                                | 100.00(10)                                                                                                  |
| Crystal system                                               | tetragonal                                                                                                  |
| Space group                                                  | <i>P</i> 4 <sub>3</sub> 2 <sub>1</sub> 2                                                                    |
| <i>a</i> /Å                                                  | 17.05960(10)                                                                                                |
| <i>b</i> /Å                                                  | 17.05960(10)                                                                                                |
| <i>c</i> /Å                                                  | 33.1893(3)                                                                                                  |
| $\alpha$ /°                                                  | 90                                                                                                          |
| $\beta$ /°                                                   | 90                                                                                                          |
| $\gamma$ /°                                                  | 90                                                                                                          |
| Volume/Å <sup>3</sup>                                        | 9659.08(14)                                                                                                 |
| <i>Z</i>                                                     | 4                                                                                                           |
| $\rho_{\text{calc}}$ /cm <sup>3</sup>                        | 1.408                                                                                                       |
| $\mu$ /mm <sup>-1</sup>                                      | 7.670                                                                                                       |
| F(000)                                                       | 4160.0                                                                                                      |
| Crystal size/mm <sup>3</sup>                                 | 0.03 × 0.01 × 0.01                                                                                          |
| Radiation                                                    | Cu K $\alpha$ ( $\lambda$ = 1.54184)                                                                        |
| 2 $\Theta$ range for data collection/°                       | 5.824 to 154.59                                                                                             |
| Index ranges                                                 | -21 ≤ <i>h</i> ≤ 21, -16 ≤ <i>k</i> ≤ 21, -41 ≤ <i>l</i> ≤ 15                                               |
| Reflections collected                                        | 31604                                                                                                       |
| Independent reflections                                      | 9714 [ <i>R</i> <sub>int</sub> = 0.0368, <i>R</i> <sub>sigma</sub> = 0.0357]                                |
| Data/restraints/parameters                                   | 9714/60/599                                                                                                 |
| Goodness-of-fit on F <sup>2</sup>                            | 1.080                                                                                                       |
| Final <i>R</i> indexes [ <i>I</i> ≥ 2 $\sigma$ ( <i>I</i> )] | <i>R</i> <sub>1</sub> = 0.0492, <i>wR</i> <sub>2</sub> = 0.1263                                             |
| Final <i>R</i> indexes [all data]                            | <i>R</i> <sub>1</sub> = 0.0536, <i>wR</i> <sub>2</sub> = 0.1292                                             |
| Largest diff. peak/hole / e Å <sup>-3</sup>                  | 1.47/-0.97                                                                                                  |
| Flack parameter                                              | 0.005 (4)                                                                                                   |

---



**Table S5.** Crystal data and structure refinement for **Pd<sub>4</sub>S<sub>2</sub>-P2<sub>1</sub>/n**.

---

|                                             |                                                                                                             |
|---------------------------------------------|-------------------------------------------------------------------------------------------------------------|
| Identification code                         | <b>Pd<sub>4</sub>S<sub>2</sub>-P2<sub>1</sub>/n</b>                                                         |
| Empirical formula                           | C <sub>89</sub> H <sub>89</sub> N <sub>2</sub> O <sub>4</sub> P <sub>6</sub> Pd <sub>4</sub> S <sub>2</sub> |
| Formula weight                              | 2001.10                                                                                                     |
| Temperature/K                               | 99.99(10)                                                                                                   |
| Crystal system                              | monoclinic                                                                                                  |
| Space group                                 | <i>P2<sub>1</sub>/n</i>                                                                                     |
| a/Å                                         | 19.66120(10)                                                                                                |
| b/Å                                         | 17.71950(10)                                                                                                |
| c/Å                                         | 26.4989(2)                                                                                                  |
| α/°                                         | 90                                                                                                          |
| β/°                                         | 91.3760(10)                                                                                                 |
| γ/°                                         | 90                                                                                                          |
| Volume/Å <sup>3</sup>                       | 9229.20(10)                                                                                                 |
| Z                                           | 4                                                                                                           |
| ρ <sub>calc</sub> /cm <sup>3</sup>          | 1.440                                                                                                       |
| μ/mm <sup>-1</sup>                          | 8.243                                                                                                       |
| F(000)                                      | 4041.0                                                                                                      |
| Crystal size/mm <sup>3</sup>                | 0.3 × 0.1 × 0.05                                                                                            |
| Radiation                                   | Cu Kα (λ = 1.54184)                                                                                         |
| 2θ range for data collection/°              | 6.674 to 153.82                                                                                             |
| Index ranges                                | -24 ≤ h ≤ 24, -21 ≤ k ≤ 19, -33 ≤ l ≤ 32                                                                    |
| Reflections collected                       | 72637                                                                                                       |
| Independent reflections                     | 18705 [R <sub>int</sub> = 0.0355, R <sub>sigma</sub> = 0.0293]                                              |
| Data/restraints/parameters                  | 18705/0/971                                                                                                 |
| Goodness-of-fit on F <sup>2</sup>           | 1.028                                                                                                       |
| Final R indexes [I ≥ 2σ (I)]                | R <sub>1</sub> = 0.0451, wR <sub>2</sub> = 0.1138                                                           |
| Final R indexes [all data]                  | R <sub>1</sub> = 0.0504, wR <sub>2</sub> = 0.1177                                                           |
| Largest diff. peak/hole / e Å <sup>-3</sup> | 1.61/-1.42                                                                                                  |

---

**Table S6.** Crystal data and structure refinement for **Pd<sub>4</sub>S<sub>2</sub>-P2<sub>1</sub>/n-MeOH**.

---

|                                             |                                                                                                             |
|---------------------------------------------|-------------------------------------------------------------------------------------------------------------|
| Identification code                         | <b>Pd<sub>4</sub>S<sub>2</sub>-P2<sub>1</sub>/n-MeOH</b>                                                    |
| Empirical formula                           | C <sub>89</sub> H <sub>95</sub> N <sub>2</sub> O <sub>4</sub> P <sub>6</sub> Pd <sub>4</sub> S <sub>2</sub> |
| Formula weight                              | 1932.20                                                                                                     |
| Temperature/K                               | 99.99(10)                                                                                                   |
| Crystal system                              | monoclinic                                                                                                  |
| Space group                                 | <i>P2<sub>1</sub>/n</i>                                                                                     |
| a/Å                                         | 19.74432(10)                                                                                                |
| b/Å                                         | 17.37353(9)                                                                                                 |
| c/Å                                         | 26.48695(12)                                                                                                |
| α/°                                         | 90                                                                                                          |
| β/°                                         | 91.0872(4)                                                                                                  |
| γ/°                                         | 90                                                                                                          |
| Volume/Å <sup>3</sup>                       | 9084.14(8)                                                                                                  |
| Z                                           | 4                                                                                                           |
| ρ <sub>calc</sub> /cm <sup>3</sup>          | 1.413                                                                                                       |
| μ/mm <sup>-1</sup>                          | 8.086                                                                                                       |
| F(000)                                      | 3924.0                                                                                                      |
| Crystal size/mm <sup>3</sup>                | 0.1 × 0.1 × 0.1                                                                                             |
| Radiation                                   | Cu Kα (λ = 1.54184)                                                                                         |
| 2θ range for data collection/°              | 6.778 to 153.778                                                                                            |
| Index ranges                                | -23 ≤ h ≤ 24, -21 ≤ k ≤ 16, -33 ≤ l ≤ 32                                                                    |
| Reflections collected                       | 75730                                                                                                       |
| Independent reflections                     | 18297 [R <sub>int</sub> = 0.0349, R <sub>sigma</sub> = 0.0256]                                              |
| Data/restraints/parameters                  | 18297/0/975                                                                                                 |
| Goodness-of-fit on F <sup>2</sup>           | 1.088                                                                                                       |
| Final R indexes [I ≥ 2σ (I)]                | R <sub>1</sub> = 0.0328, wR <sub>2</sub> = 0.0842                                                           |
| Final R indexes [all data]                  | R <sub>1</sub> = 0.0341, wR <sub>2</sub> = 0.0849                                                           |
| Largest diff. peak/hole / e Å <sup>-3</sup> | 0.64/-1.38                                                                                                  |

---

**Table S7.** Crystal data and structure refinement for **Pd<sub>4</sub>S<sub>2</sub>-P2<sub>1</sub>/n-PF<sub>6</sub><sup>-</sup>**.

|                                             |                                                                                                               |
|---------------------------------------------|---------------------------------------------------------------------------------------------------------------|
| Identification code                         | <b>Pd<sub>4</sub>S<sub>2</sub>-P2<sub>1</sub>/n-PF<sub>6</sub><sup>-</sup></b>                                |
| Empirical formula                           | C <sub>89</sub> H <sub>94</sub> F <sub>12</sub> N <sub>2</sub> OP <sub>8</sub> Pd <sub>4</sub> S <sub>2</sub> |
| Formula weight                              | 2173.14                                                                                                       |
| Temperature/K                               | 100.00(10)                                                                                                    |
| Crystal system                              | monoclinic                                                                                                    |
| Space group                                 | <i>P2<sub>1</sub>/n</i>                                                                                       |
| a/Å                                         | 19.8370(2)                                                                                                    |
| b/Å                                         | 17.6551(2)                                                                                                    |
| c/Å                                         | 27.0748(3)                                                                                                    |
| α/°                                         | 90                                                                                                            |
| β/°                                         | 90.3570(10)                                                                                                   |
| γ/°                                         | 90                                                                                                            |
| Volume/Å <sup>3</sup>                       | 9482.06(18)                                                                                                   |
| Z                                           | 4                                                                                                             |
| ρ <sub>calc</sub> /cm <sup>3</sup>          | 1.522                                                                                                         |
| μ/mm <sup>-1</sup>                          | 8.288                                                                                                         |
| F(000)                                      | 4376.0                                                                                                        |
| Crystal size/mm <sup>3</sup>                | 0.1 × 0.1 × 0.1                                                                                               |
| Radiation                                   | Cu Kα (λ = 1.54184)                                                                                           |
| 2θ range for data collection/°              | 5.506 to 153.898                                                                                              |
| Index ranges                                | -24 ≤ h ≤ 24, -22 ≤ k ≤ 15, -28 ≤ l ≤ 33                                                                      |
| Reflections collected                       | 74727                                                                                                         |
| Independent reflections                     | 19111 [R <sub>int</sub> = 0.0600, R <sub>sigma</sub> = 0.0501]                                                |
| Data/restraints/parameters                  | 19111/0/1071                                                                                                  |
| Goodness-of-fit on F <sup>2</sup>           | 1.037                                                                                                         |
| Final R indexes [I ≥ 2σ (I)]                | R <sub>1</sub> = 0.0526, wR <sub>2</sub> = 0.1343                                                             |
| Final R indexes [all data]                  | R <sub>1</sub> = 0.0654, wR <sub>2</sub> = 0.1433                                                             |
| Largest diff. peak/hole / e Å <sup>-3</sup> | 1.95/-1.12                                                                                                    |

**Table S8.** Crystal data and structure refinement for **S-Phos&S-Pd<sub>4</sub>S<sub>2</sub>**.

---

|                                                              |                                                                                                                |
|--------------------------------------------------------------|----------------------------------------------------------------------------------------------------------------|
| Identification code                                          | <b>S-Phos&amp;S-Pd<sub>4</sub>S<sub>2</sub></b>                                                                |
| Empirical formula                                            | C <sub>131</sub> H <sub>134</sub> N <sub>2</sub> O <sub>15</sub> P <sub>8</sub> Pd <sub>4</sub> S <sub>2</sub> |
| Formula weight                                               | 2713.87                                                                                                        |
| Temperature/K                                                | 100.01(10)                                                                                                     |
| Crystal system                                               | monoclinic                                                                                                     |
| Space group                                                  | <i>P</i> 2 <sub>1</sub>                                                                                        |
| <i>a</i> /Å                                                  | 17.89913(7)                                                                                                    |
| <i>b</i> /Å                                                  | 17.52003(7)                                                                                                    |
| <i>c</i> /Å                                                  | 20.32819(7)                                                                                                    |
| $\alpha$ /°                                                  | 90                                                                                                             |
| $\beta$ /°                                                   | 107.7876(4)                                                                                                    |
| $\gamma$ /°                                                  | 90                                                                                                             |
| Volume/Å <sup>3</sup>                                        | 6070.04(4)                                                                                                     |
| <i>Z</i>                                                     | 2                                                                                                              |
| $\rho_{\text{calc}}$ /cm <sup>3</sup>                        | 1.485                                                                                                          |
| $\mu$ /mm <sup>-1</sup>                                      | 6.542                                                                                                          |
| <i>F</i> (000)                                               | 2780.0                                                                                                         |
| Crystal size/mm <sup>3</sup>                                 | 0.3 × 0.1 × 0.1                                                                                                |
| Radiation                                                    | Cu K $\alpha$ ( $\lambda$ = 1.54184)                                                                           |
| 2 $\Theta$ range for data collection/°                       | 6.806 to 147.572                                                                                               |
| Index ranges                                                 | -20 ≤ <i>h</i> ≤ 22, -20 ≤ <i>k</i> ≤ 21, -25 ≤ <i>l</i> ≤ 25                                                  |
| Reflections collected                                        | 113847                                                                                                         |
| Independent reflections                                      | 23470 [ <i>R</i> <sub>int</sub> = 0.0336, <i>R</i> <sub>sigma</sub> = 0.0269]                                  |
| Data/restraints/parameters                                   | 23470/41/1480                                                                                                  |
| Goodness-of-fit on <i>F</i> <sup>2</sup>                     | 1.030                                                                                                          |
| Final <i>R</i> indexes [ <i>I</i> ≥ 2 $\sigma$ ( <i>I</i> )] | <i>R</i> <sub>1</sub> = 0.0297, <i>wR</i> <sub>2</sub> = 0.0771                                                |
| Final <i>R</i> indexes [all data]                            | <i>R</i> <sub>1</sub> = 0.0307, <i>wR</i> <sub>2</sub> = 0.0784                                                |
| Largest diff. peak/hole / e Å <sup>-3</sup>                  | 0.99/-1.10                                                                                                     |
| Flack parameter                                              | -0.017(2)                                                                                                      |

---

**Table S9.** Crystal data and structure refinement for **R-Phos&R-Pd4S2**.

|                                             |                                                                                                                |
|---------------------------------------------|----------------------------------------------------------------------------------------------------------------|
| Identification code                         | <b>R-Phos&amp;R-Pd4S2</b>                                                                                      |
| Empirical formula                           | C <sub>131</sub> H <sub>134</sub> N <sub>2</sub> O <sub>15</sub> P <sub>8</sub> Pd <sub>4</sub> S <sub>2</sub> |
| Formula weight                              | 2713.87                                                                                                        |
| Temperature/K                               | 100.01(10)                                                                                                     |
| Crystal system                              | monoclinic                                                                                                     |
| Space group                                 | <i>P</i> 2 <sub>1</sub>                                                                                        |
| a/Å                                         | 17.87810(10)                                                                                                   |
| b/Å                                         | 17.51700(10)                                                                                                   |
| c/Å                                         | 20.33390(10)                                                                                                   |
| α/°                                         | 90                                                                                                             |
| β/°                                         | 107.6150(10)                                                                                                   |
| γ/°                                         | 90                                                                                                             |
| Volume/Å <sup>3</sup>                       | 6069.39(7)                                                                                                     |
| Z                                           | 2                                                                                                              |
| ρ <sub>calc</sub> /cm <sup>3</sup>          | 1.485                                                                                                          |
| μ/mm <sup>-1</sup>                          | 6.543                                                                                                          |
| F(000)                                      | 2780.0                                                                                                         |
| Crystal size/mm <sup>3</sup>                | 0.3 × 0.1 × 0.1                                                                                                |
| Radiation                                   | Cu Kα (λ = 1.54184)                                                                                            |
| 2θ range for data collection/°              | 6.802 to 147.582                                                                                               |
| Index ranges                                | -22 ≤ h ≤ 22, -20 ≤ k ≤ 21, -25 ≤ l ≤ 23                                                                       |
| Reflections collected                       | 112583                                                                                                         |
| Independent reflections                     | 23507 [R <sub>int</sub> = 0.0336, R <sub>sigma</sub> = 0.0249]                                                 |
| Data/restraints/parameters                  | 23507/2876/1477                                                                                                |
| Goodness-of-fit on F <sup>2</sup>           | 1.029                                                                                                          |
| Final R indexes [I ≥ 2σ (I)]                | R <sub>1</sub> = 0.0300, wR <sub>2</sub> = 0.0765                                                              |
| Final R indexes [all data]                  | R <sub>1</sub> = 0.0315, wR <sub>2</sub> = 0.0782                                                              |
| Largest diff. peak/hole / e Å <sup>-3</sup> | 1.07/-1.07                                                                                                     |
| Flack parameter                             | -0.016(2)                                                                                                      |

**Table S10.** The Flack parameters and  $R_{\text{int}}$  values of 20 spontaneous resolution  $\text{Pd}_4\text{S}_2$  crystals grown in the one pot.

| Sample number | Space group | Flack parameters | $R_{\text{int}}$ values |
|---------------|-------------|------------------|-------------------------|
| 1             | $P4_32_12$  | -0.008(5)        | 4.08%                   |
| 2             | $P4_32_12$  | 0.001(5)         | 4.28%                   |
| 3             | $P4_12_12$  | 0.007(5)         | 4.19%                   |
| 4             | $P4_12_12$  | -0.008(5)        | 4.42%                   |
| 5             | $P4_32_12$  | 0.014(7)         | 5.30%                   |
| 6             | $P4_32_12$  | 0.007(4)         | 4.02%                   |
| 7             | $P4_12_12$  | -0.004(6)        | 4.45%                   |
| 8             | $P4_32_12$  | 0.007(6)         | 6.04%                   |
| 9             | $P4_32_12$  | 0.000(9)         | 5.50%                   |
| 10            | $P4_12_12$  | -0.004(5)        | 4.64%                   |
| 11            | $P4_32_12$  | -0.015(5)        | 4.01%                   |
| 12            | $P4_32_12$  | 0.017(5)         | 4.31%                   |
| 13            | $P4_12_12$  | 0.005(6)         | 4.07%                   |
| 14            | $P4_32_12$  | -0.004(4)        | 4.13%                   |
| 15            | $P4_12_12$  | 0.018(5)         | 4.14%                   |
| 16            | $P4_32_12$  | 0.012(14)        | 5.76%                   |
| 17            | $P4_12_12$  | 0.008(6)         | 4.01%                   |
| 18            | $P4_12_12$  | -0.006(7)        | 4.35%                   |
| 19            | $P4_32_12$  | -0.007(5)        | 4.00%                   |
| 20            | $P4_12_12$  | 0.004(5)         | 4.02%                   |

**Table S11.** The average volume of individual **Pd<sub>4</sub>S<sub>2</sub>** clusters with different space groups.

| Crystal                                                                         | Unit cell volume | Z | Unit cell volume/Z |
|---------------------------------------------------------------------------------|------------------|---|--------------------|
| <b>Pd<sub>4</sub>S<sub>2</sub>-P4<sub>1</sub>2<sub>1</sub>2-twin</b>            | 9727.07          | 4 | 2431.77            |
| <b>Pd<sub>4</sub>S<sub>2</sub>-P4<sub>3</sub>2<sub>1</sub>2-twin</b>            | 9663.55          | 4 | 2415.89            |
| <b>Pd<sub>4</sub>S<sub>2</sub>-P4<sub>1</sub>2<sub>1</sub>2</b>                 | 9660.74          | 4 | 2415.19            |
| <b>Pd<sub>4</sub>S<sub>2</sub>-P4<sub>3</sub>2<sub>1</sub>2</b>                 | 9659.08          | 4 | 2414.77            |
| <b>Pd<sub>4</sub>S<sub>2</sub>- P2<sub>1</sub>/n</b>                            | 9229.20          | 4 | 2307.30            |
| <b>Pd<sub>4</sub>S<sub>2</sub>- P2<sub>1</sub>/n-MeOH</b>                       | 9084.14          | 4 | 2271.04            |
| <b>Pd<sub>4</sub>S<sub>2</sub>- P2<sub>1</sub>/n-PF<sub>6</sub><sup>-</sup></b> | 9482.06          | 4 | 2370.52            |

**Table S12.** Summary of hydrogen bonds,  $\pi\dots\pi$ , or C-H... $\pi$  interactions in **Pd<sub>4</sub>S<sub>2</sub>-P<sub>4</sub>I<sub>2</sub>I<sub>2</sub>**.

| Hydrogen bonds   | D...A (Å)    | H...A (Å) | Symmetry operation  |
|------------------|--------------|-----------|---------------------|
| O4-O00U          | 2.61(2)      | 1.80      | x,y,z               |
| O6-O9            | 2.48(3)      | 1.64      | x,y,z               |
| C007-O8          | 3.116(18)    | 2.15      | x,y,z               |
| C009-O9          | 3.380(16)    | 2.43      | 1/2-y,-1/2+x,1/4+z  |
| C105-O8          | 3.38(4)      | 2.51      | x,y,z               |
| C00I-O8          | 3.48(2)      | 2.55      | x,y,z               |
| C00K-O00U        | 3.426(16)    | 2.51      | -1/2+y,1/2-x,-1/4+z |
| C00N-O4          | 3.435(19)    | 2.49      | 1/2+x,1/2-y,3/4-z   |
| C00O-O3          | 3.24(2)      | 2.43      | -1/2+y,1/2-x,-1/4+z |
| C00Q-O1          | 3.240(17)    | 2.49      | 1-y,1-x,1/2-z       |
| C00Y-O6          | 3.33(2)      | 2.39      | 1-y,1-x,1/2-z       |
| C013-O1          | 3.102(17)    | 2.35      | x,y,z               |
| C01M-O1          | 3.29(2)      | 2.42      | -1/2+x,3/2-y,3/4-z  |
| $\pi\dots\pi$    | Distance (Å) |           | Symmetry operation  |
| Cg19-Cg21        | 3.845(4)     |           | x,y,z               |
| C-H... $\pi$     | Distance (Å) |           | Symmetry operation  |
| C015-H015...Cg20 | 2.92         |           | -1/2+x,1/2-y,3/4-z  |
| C00Z-H00Z...Cg19 | 2.74         |           | x,y,z               |

Cg19: phenyl group of C00D, C00F, C00O, C00K, C00P, C00S.

Cg20: phenyl group of C00L, C00X, C013, C00Y, C00T, C010.

Cg21: phenyl group of C00V, C012, C015, C00R, C014, C00J.

The distance of  $\pi\dots\pi$  refers to the distance between the centroids of the phenyl groups.

The distance of C-H... $\pi$  refers to the distance between the H atom and the centroid of the phenyl group.



**Table S13.** Number of HOAc, OAc<sup>-</sup>, and MeOH in different **Pd<sub>4</sub>S<sub>2</sub>** crystals as determined by <sup>1</sup>H NMR.

| Crystals                                                                                          | HOAc | OAc <sup>-</sup> | MeOH |
|---------------------------------------------------------------------------------------------------|------|------------------|------|
| <b>Pd<sub>4</sub>S<sub>2</sub>-P4<sub>1</sub>2<sub>1</sub>2/P4<sub>3</sub>2<sub>1</sub>2</b>      | 3    | 2                | 0    |
| <b>Pd<sub>4</sub>S<sub>2</sub>-P4<sub>1</sub>2<sub>1</sub>2/P4<sub>3</sub>2<sub>1</sub>2-twin</b> | 3    | 2                | 0    |
| <b>Pd<sub>4</sub>S<sub>2</sub>-P2<sub>1</sub>/n</b>                                               | ≈1   | 2                | 0    |
| <b>Pd<sub>4</sub>S<sub>2</sub>-P2<sub>1</sub>/n-MeOH</b>                                          | 0    | 2                | ≈2   |

**Table S14.** Crystal data and structure refinement for **S-Phos&R-Pd<sub>4</sub>S<sub>2</sub>**.

|                                             |                                                                                                               |
|---------------------------------------------|---------------------------------------------------------------------------------------------------------------|
| Identification code                         | <b>S-Phos&amp;R-Pd<sub>4</sub>S<sub>2</sub></b>                                                               |
| Empirical formula                           | C <sub>125</sub> H <sub>108</sub> N <sub>2</sub> O <sub>8</sub> P <sub>8</sub> Pd <sub>4</sub> S <sub>2</sub> |
| Formula weight                              | 2503.61                                                                                                       |
| Temperature/K                               | 100.01(10)                                                                                                    |
| Crystal system                              | monoclinic                                                                                                    |
| Space group                                 | <i>P</i> 2 <sub>1</sub>                                                                                       |
| a/Å                                         | 19.34060(10)                                                                                                  |
| b/Å                                         | 17.25180(10)                                                                                                  |
| c/Å                                         | 37.5232(4)                                                                                                    |
| α/°                                         | 90                                                                                                            |
| β/°                                         | 96.3380(10)                                                                                                   |
| γ/°                                         | 90                                                                                                            |
| Volume/Å <sup>3</sup>                       | 12443.47(14)                                                                                                  |
| Z                                           | 4                                                                                                             |
| ρ <sub>calc</sub> /cm <sup>3</sup>          | 1.336                                                                                                         |
| μ/mm <sup>-1</sup>                          | 6.296                                                                                                         |
| F(000)                                      | 5088.0                                                                                                        |
| Crystal size/mm <sup>3</sup>                | 0.05 × 0.02 × 0.01                                                                                            |
| Radiation                                   | Cu Kα (λ = 1.54184)                                                                                           |
| 2θ range for data collection/°              | 4.596 to 130.178                                                                                              |
| Index ranges                                | -22 ≤ h ≤ 22, -20 ≤ k ≤ 20, -44 ≤ l ≤ 44                                                                      |
| Reflections collected                       | 216526                                                                                                        |
| Independent reflections                     | 42048 [R <sub>int</sub> = 0.0712, R <sub>sigma</sub> = 0.0507]                                                |
| Data/restraints/parameters                  | 42048/3115/2215                                                                                               |
| Goodness-of-fit on F <sup>2</sup>           | 1.037                                                                                                         |
| Final R indexes [I ≥ 2σ (I)]                | R <sub>1</sub> = 0.0851, wR <sub>2</sub> = 0.2234                                                             |
| Final R indexes [all data]                  | R <sub>1</sub> = 0.0919, wR <sub>2</sub> = 0.2282                                                             |
| Largest diff. peak/hole / e Å <sup>-3</sup> | 2.63/-1.47                                                                                                    |
| Flack parameter                             | 0.058(12)                                                                                                     |

**Table S15.** Crystal data and structure refinement for **R-Phos&S-Pd<sub>4</sub>S<sub>2</sub>**.

|                                             |                                                                                                               |
|---------------------------------------------|---------------------------------------------------------------------------------------------------------------|
| Identification code                         | <b>R-Phos&amp;S-Pd<sub>4</sub>S<sub>2</sub></b>                                                               |
| Empirical formula                           | C <sub>125</sub> H <sub>108</sub> N <sub>2</sub> O <sub>8</sub> P <sub>8</sub> Pd <sub>4</sub> S <sub>2</sub> |
| Formula weight                              | 2503.61                                                                                                       |
| Temperature/K                               | 99.99(10)                                                                                                     |
| Crystal system                              | monoclinic                                                                                                    |
| Space group                                 | <i>P</i> 2 <sub>1</sub>                                                                                       |
| a/Å                                         | 19.37370(10)                                                                                                  |
| b/Å                                         | 17.25020(10)                                                                                                  |
| c/Å                                         | 37.8551(3)                                                                                                    |
| α/°                                         | 90                                                                                                            |
| β/°                                         | 96.7660(10)                                                                                                   |
| γ/°                                         | 90                                                                                                            |
| Volume/Å <sup>3</sup>                       | 12563.07(14)                                                                                                  |
| Z                                           | 4                                                                                                             |
| ρ <sub>calc</sub> /cm <sup>3</sup>          | 1.324                                                                                                         |
| μ/mm <sup>-1</sup>                          | 6.236                                                                                                         |
| F(000)                                      | 5088.0                                                                                                        |
| Crystal size/mm <sup>3</sup>                | 0.05 × 0.05 × 0.02                                                                                            |
| Radiation                                   | Cu Kα (λ = 1.54184)                                                                                           |
| 2θ range for data collection/°              | 4.594 to 155.504                                                                                              |
| Index ranges                                | -24 ≤ h ≤ 24, -21 ≤ k ≤ 21, -47 ≤ l ≤ 47                                                                      |
| Reflections collected                       | 244642                                                                                                        |
| Independent reflections                     | 50499 [R <sub>int</sub> = 0.0666, R <sub>sigma</sub> = 0.0481]                                                |
| Data/restraints/parameters                  | 50499/1958/2407                                                                                               |
| Goodness-of-fit on F <sup>2</sup>           | 1.019                                                                                                         |
| Final R indexes [I ≥ 2σ (I)]                | R <sub>1</sub> = 0.0722, wR <sub>2</sub> = 0.1814                                                             |
| Final R indexes [all data]                  | R <sub>1</sub> = 0.0773, wR <sub>2</sub> = 0.1848                                                             |
| Largest diff. peak/hole / e Å <sup>-3</sup> | 1.43/-1.47                                                                                                    |
| Flack parameter                             | 0.043(8)                                                                                                      |

- [1] I. I. Moiseev, T. A. Stromnova, M. N. Vargaftig, G. J. Mazo, L. G. Kuz'Mina, Y. T. Struchkov, *J. Chem. Soc., Chem. Commun.* **1978**, 0, 27-28.
- [2] 1.171.41.116a ed., Rigaku Oxford Diffraction, **2021**.
- [3] G. Sheldrick, *Acta Crystallogr., Sect. A: Found. Adv.* **2015**, 71, 3-8.
- [4] G. Sheldrick, *Acta Crystallogr., Sect. C: Struct. Chem.* **2015**, 71, 3-8.
- [5] O. V. Dolomanov, L. J. Bourhis, R. J. Gildea, J. A. K. Howard, H. Puschmann, *J. Appl. Crystallogr.* **2009**, 42, 339-341.
- [6] A. Spek, *Acta Crystallogr., Sect. C: Struct. Chem.* **2015**, 71, 9-18.
- [7] A. Spek, *Acta Crystallogr., Sect. D: Struct. Biol.* **2009**, 65, 148-155.
